# Supplementary material for: Anomalous near-infrared emission and the underlying “structure-luminescence” correlation in the multi-peak emission system of KScF4:Yb3+,Mn2+
Source: Royal Society of Chemistry journal article supplement (doi:10.1039/d4tc04617j), 2025-01-01
Supplement: d4tc04617j1.pdf [file d4tc04617j1.pdf]

## Supporting Information

### **Anomalous Near-infrared Emission and the Underlying “Structure-Luminescence” Correlation in the Multi-Peak Emission System of KScF<sub>4</sub>: Yb<sup>3+</sup>, Mn<sup>2+</sup>**

*Xinyi Wang, Xinxin Han\*, Ni Zhang, Lingyi Wang, Hengjuan Deng, Sheng Cao, Jialong Zhao, Bingsuo Zou\**

School of Physical Science and Technology, State Key Laboratory of Featured Metal Materials and Life-cycle Safety for Composite Structures, Guangxi Key Laboratory of Processing for Nonferrous Metals and Featured Materials, Guangxi University, Nanning 530004, China.

\*Corresponding authors: xxhan@gxu.edu.cn (X. Han); zoubs@gxu.edu.cn (B. Zou)

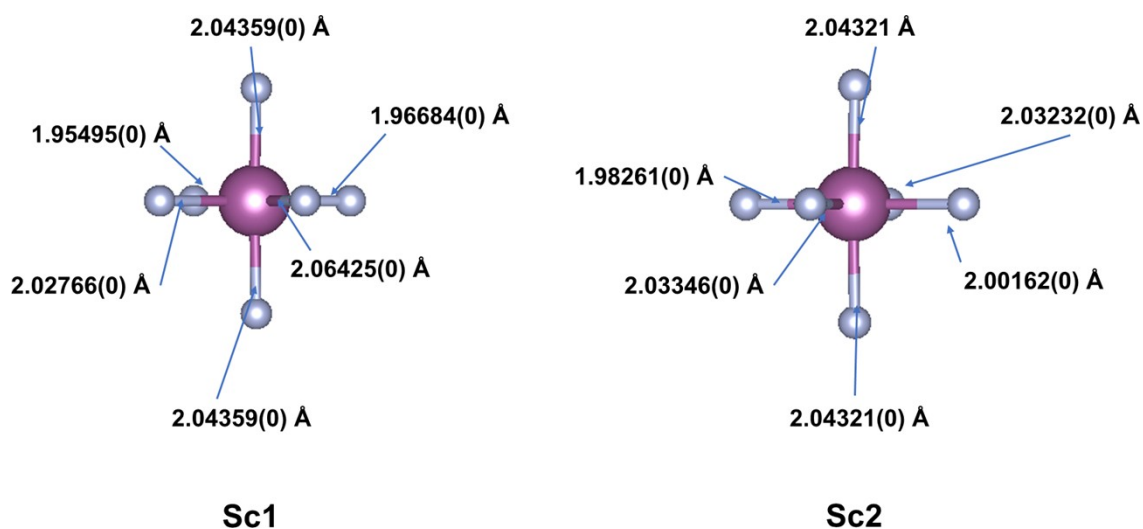

**Fig. S1** The bond length of each Sc-F is in [Sc1F<sub>6</sub>] and [Sc2F<sub>6</sub>] octahedrons.

The average bond lengths of Sc-F in [Sc1F<sub>6</sub>] and [Sc2F<sub>6</sub>] octahedrons is 2.0168 Å and 2.0227 Å, respectively. In addition, the distortion indices of [Sc1F<sub>6</sub>] and [Sc2F<sub>6</sub>] octahedrons are calculated to be 0.01864 and 0.01021, respectively, according to the fomular

$$D_{dis} = \frac{1}{n} \sum_{i=1}^n \frac{|d_i - d_{av}|}{d_{av}} \quad [1]$$

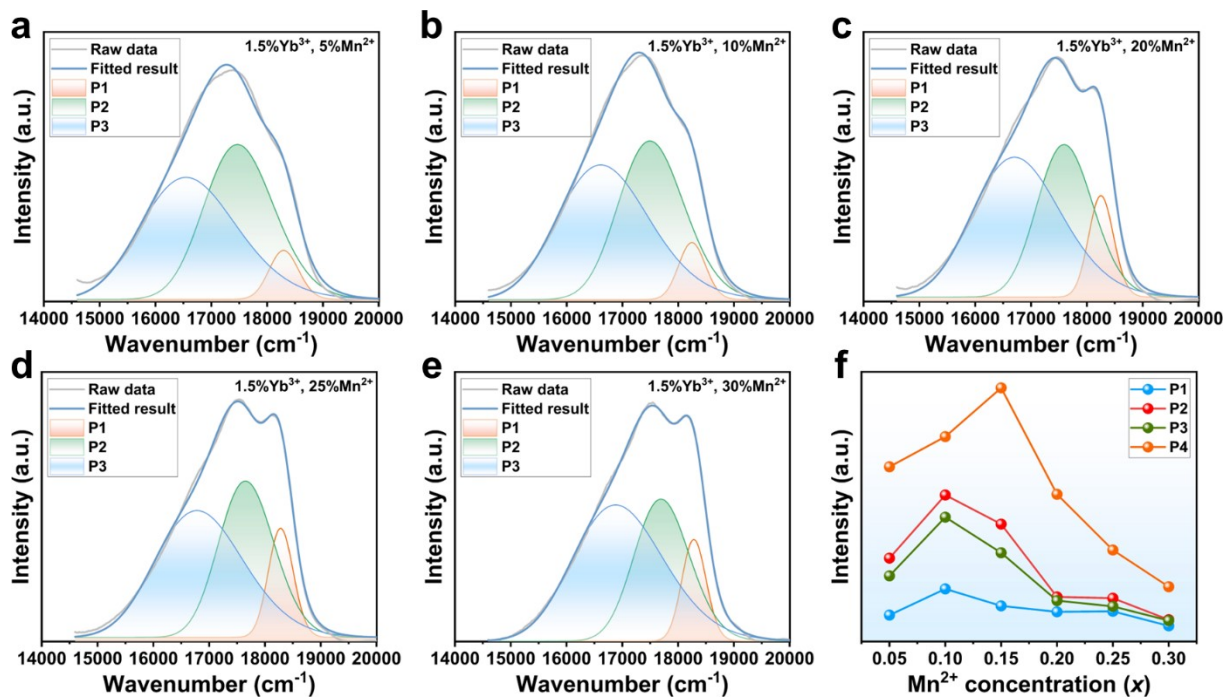

**Fig. S2** (a-e) Gaussian decomposition of the emission peaks of KScF<sub>4</sub>: 1.5%Yb<sup>3+</sup>, xMn<sup>2+</sup> (x = 5%-30%). (f) Variation trends of P1, P2, P3 and P4 emission intensities with Mn<sup>2+</sup> concentration.

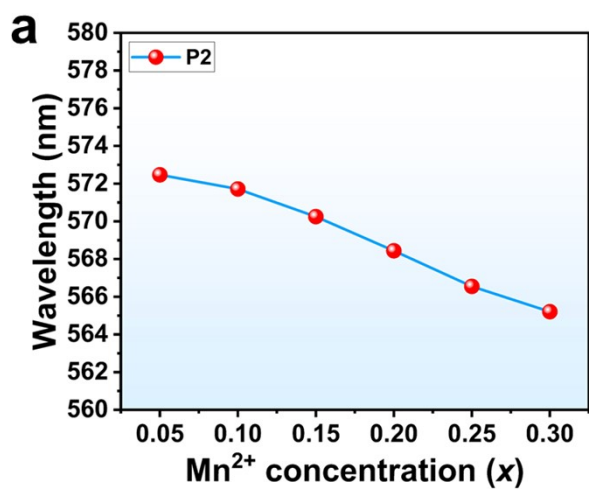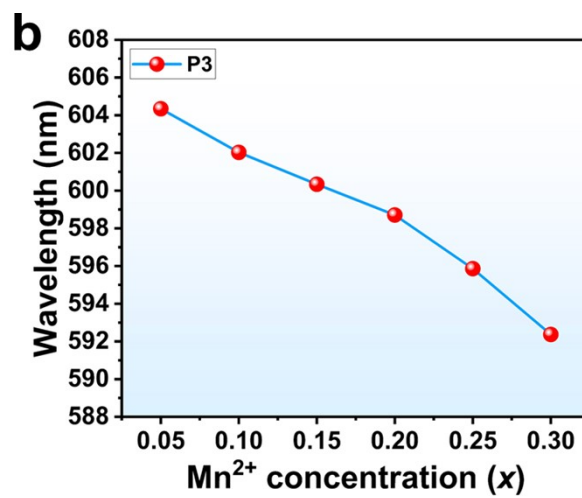

Fig. S3 Peak positions of (a) P2 and (b) P3 as a function of Mn<sup>2+</sup> concentration.

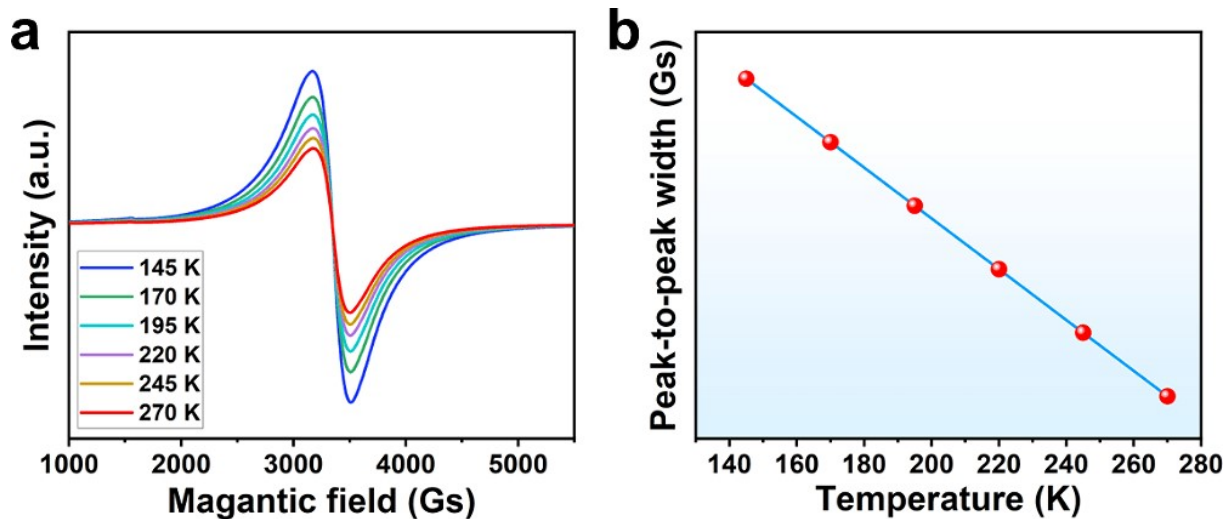

**Fig. S4** (a) Variable Temperature ERP of KScF<sub>4</sub>: 1.5%Yb<sup>3+</sup>, 5%Mn<sup>2+</sup>. (b) Peak-to-peak width with temperature in variable Temperature ERP of KScF<sub>4</sub>: 1.5%Yb<sup>3+</sup>, 5%Mn<sup>2+</sup>.

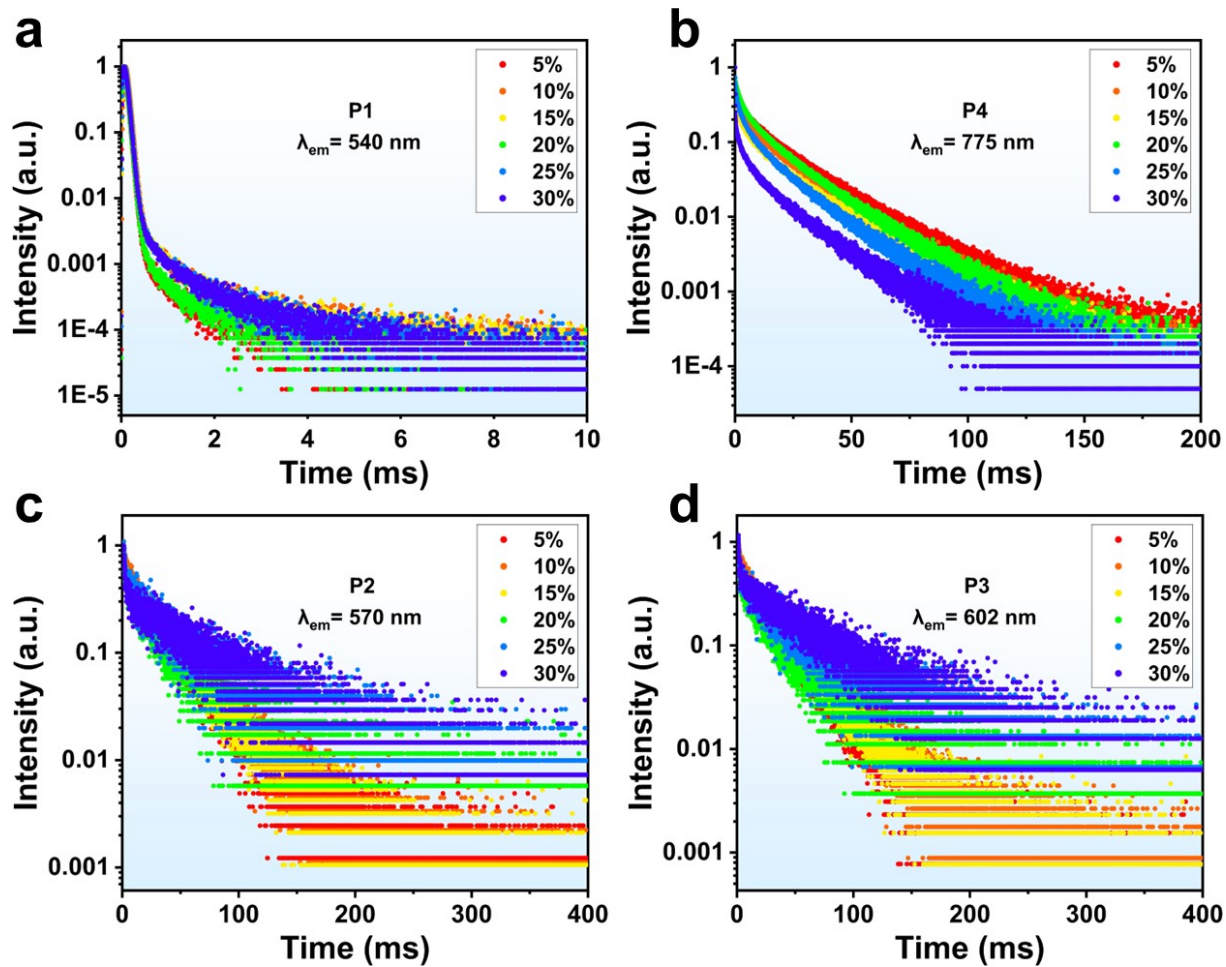

Fig. S5 Fluorescence decay curves of P1-P4 upon 396 nm excitation.

**Table S1** Fluorescence lifetime of P1-P6.

| Mn <sup>2+</sup><br>concentration<br>(x) | $\tau$ P1<br>(ms) | $\tau$ P2<br>(ms) | $\tau$ P3<br>(ms) | $\tau$ P4<br>(ms) | $\tau$ P5<br>(ms) | $\tau$ P6<br>(ms) |
|------------------------------------------|-------------------|-------------------|-------------------|-------------------|-------------------|-------------------|
| 5%                                       | 0.07155           | 28.2841           | 28.1640           | 17.5457           | 1.7128            | 14.6435           |
| 10%                                      | 0.07073           | 27.0738           | 26.6328           | 15.0310           | 1.5637            | 13.3748           |
| 15%                                      | 0.06843           | 25.7021           | 25.9700           | 14.9756           | 1.3724            | 12.7804           |
| 20%                                      | 0.06612           | 24.6289           | 24.1434           | 13.8272           | 1.0401            | 12.2440           |
| 25%                                      | 0.06564           | 22.0052           | 22.3478           | 10.8412           | 0.9826            | 11.2419           |
| 30%                                      | 0.06464           | 20.3843           | 20.4329           | 7.28378           | 0.9714            | 10.8110           |

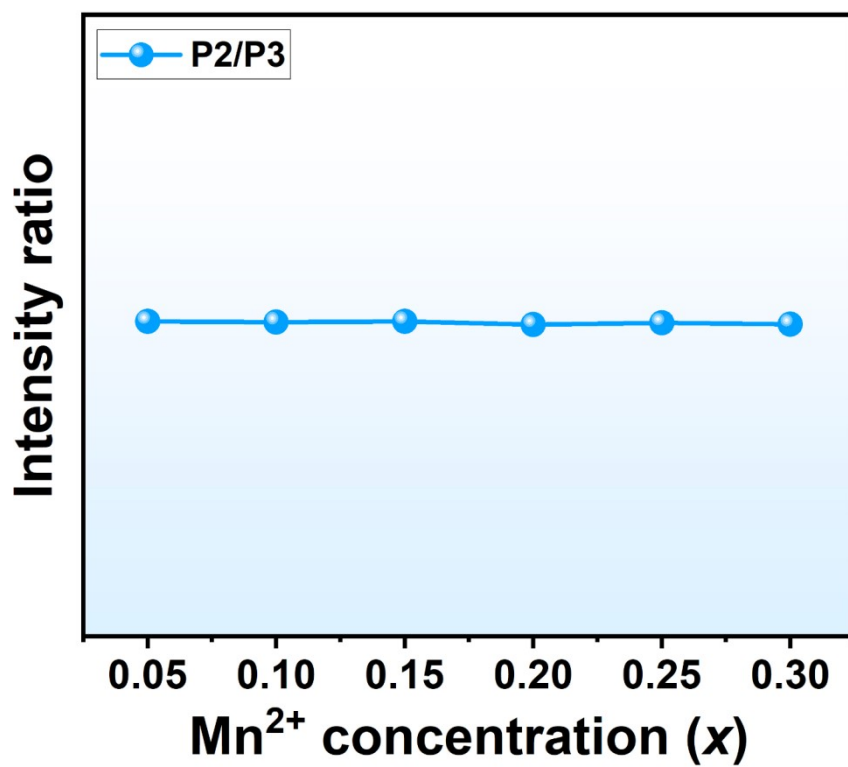

**Fig. S6** The emission intensity ratio of P2 to P3 with changing Mn<sup>2+</sup> concentration.



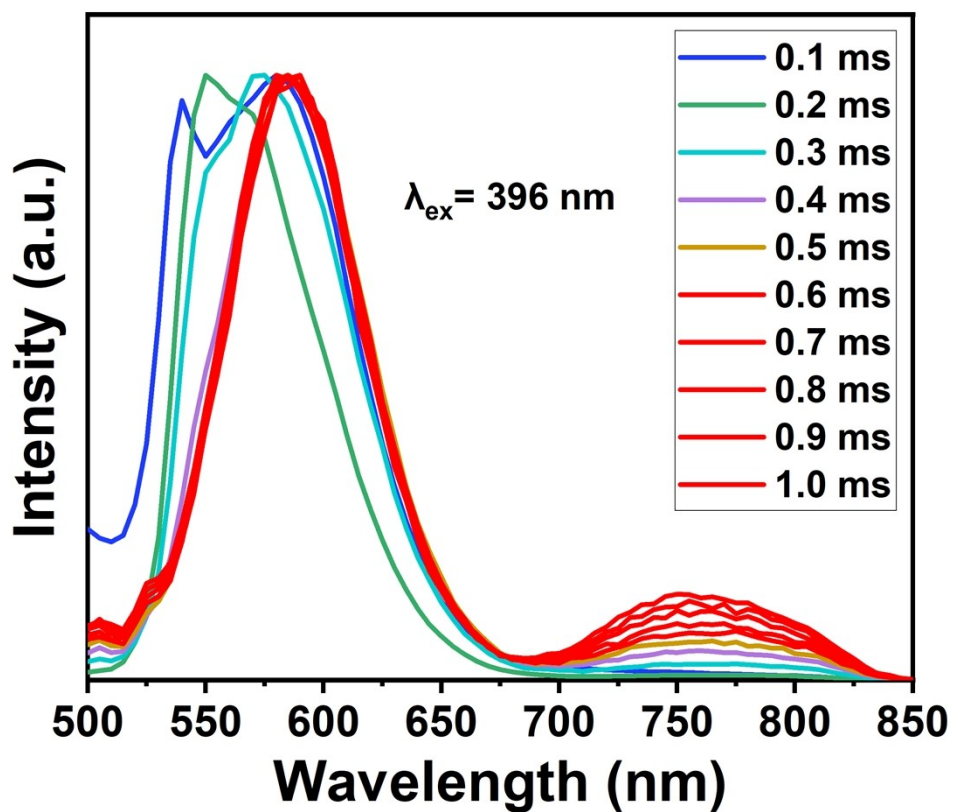

**Fig. S7** The time-resolved spectrum of KScF<sub>4</sub>: 1.5%Yb<sup>3+</sup>, 20%Mn<sup>2+</sup> excited by 396 nm light. (The difference between the spectra which were shown in the original manuscript lies in the difference between the measurement and calibration of the instrument.).

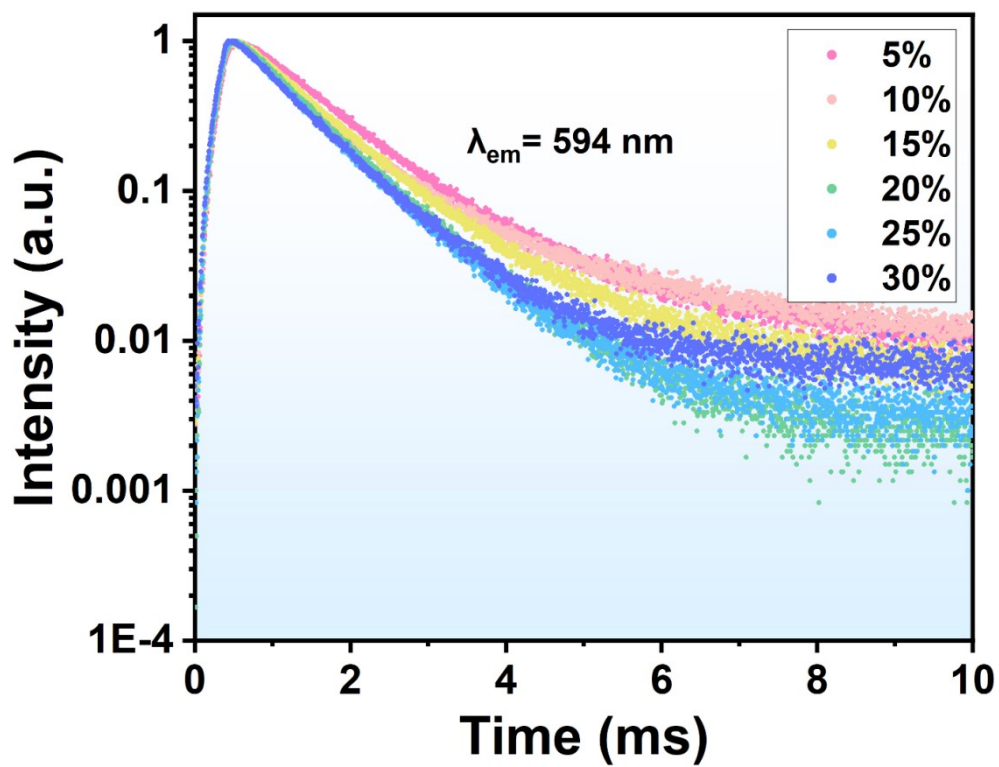

Fig. S8 The initial 10 s of the UC decay curves of P5.

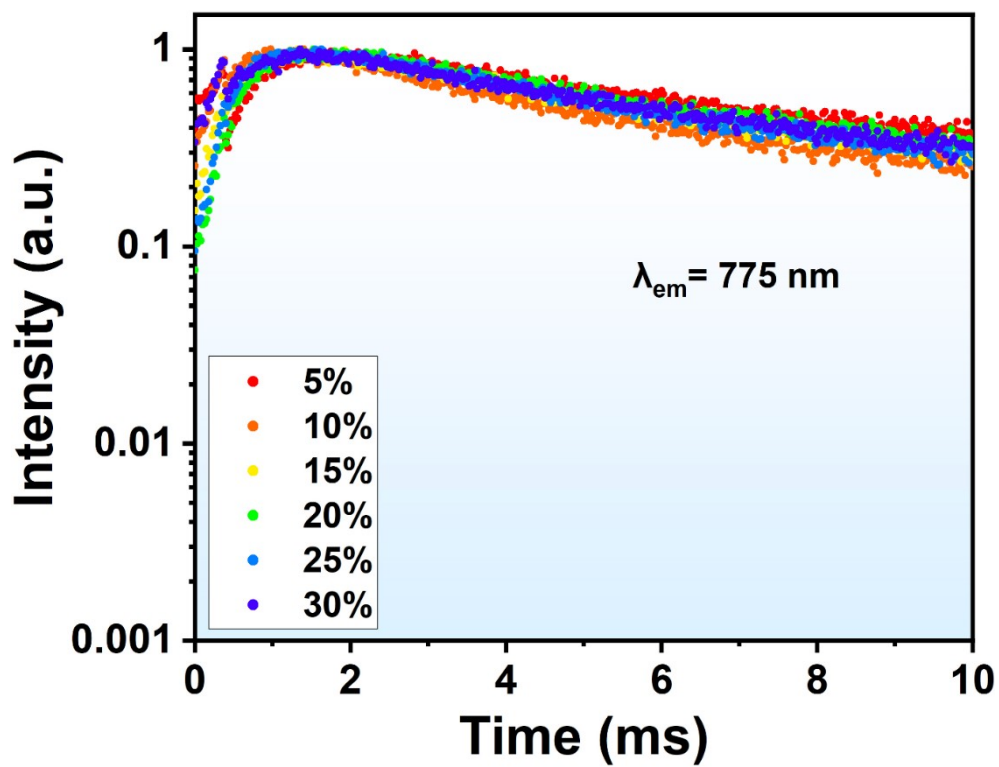

Fig. S9 The initial 10 s of the UC decay curves of P6.

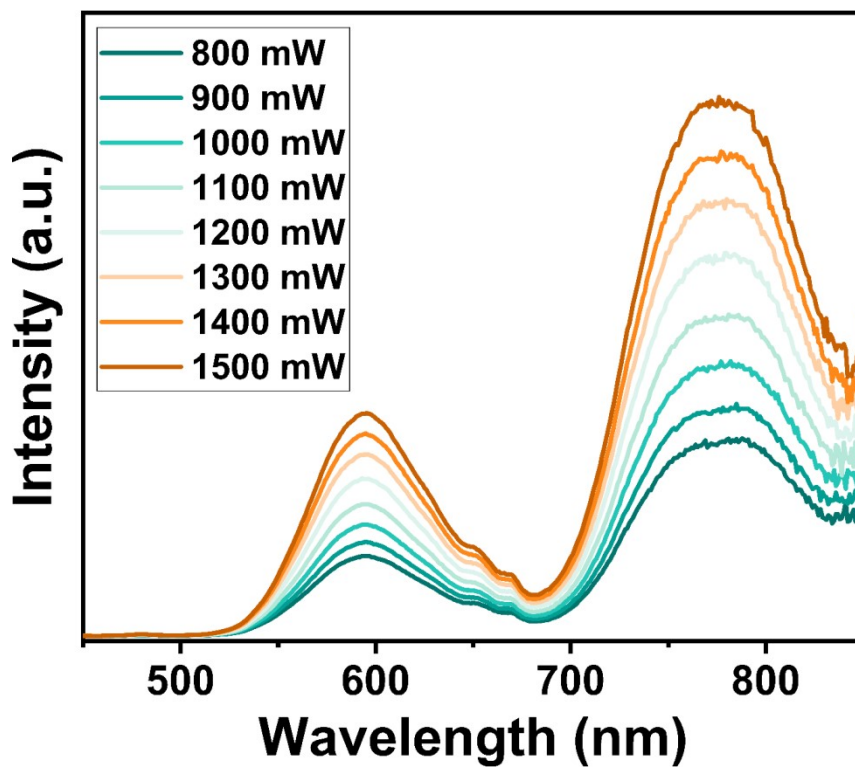

**Fig. S10** Pump power-dependent UC emission spectra of  $\text{KScF}_4: 1.5\% \text{Yb}^{3+}, 20\% \text{Mn}^{2+}$ .

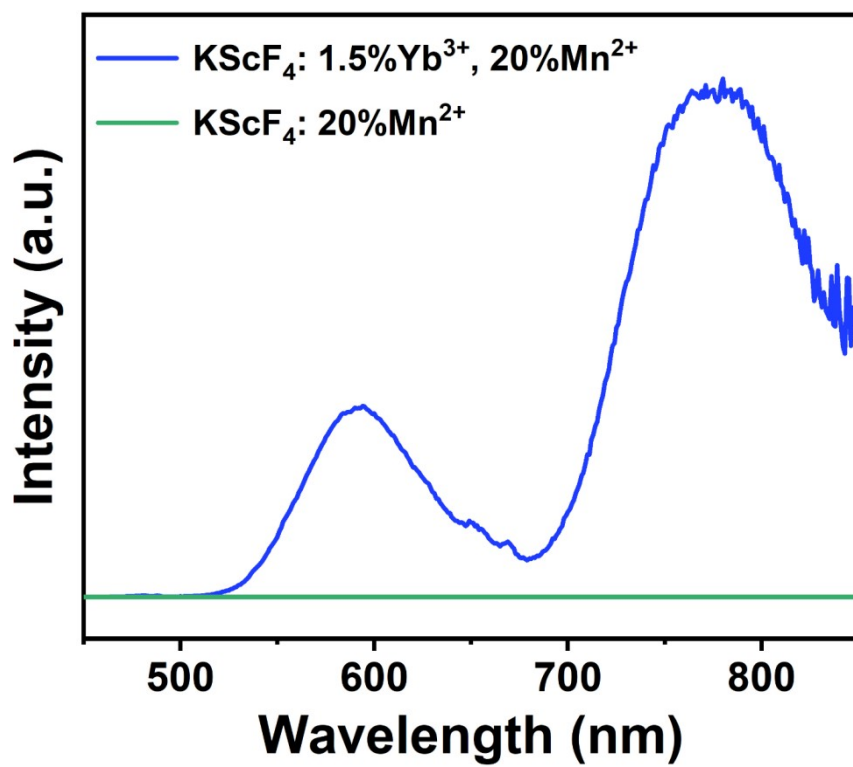

**Fig. S11** UC emission spectra of KScF<sub>4</sub>: 1.5%Yb<sup>3+</sup>, 20%Mn<sup>2+</sup> and KScF<sub>4</sub>: 20%Mn<sup>2+</sup>.

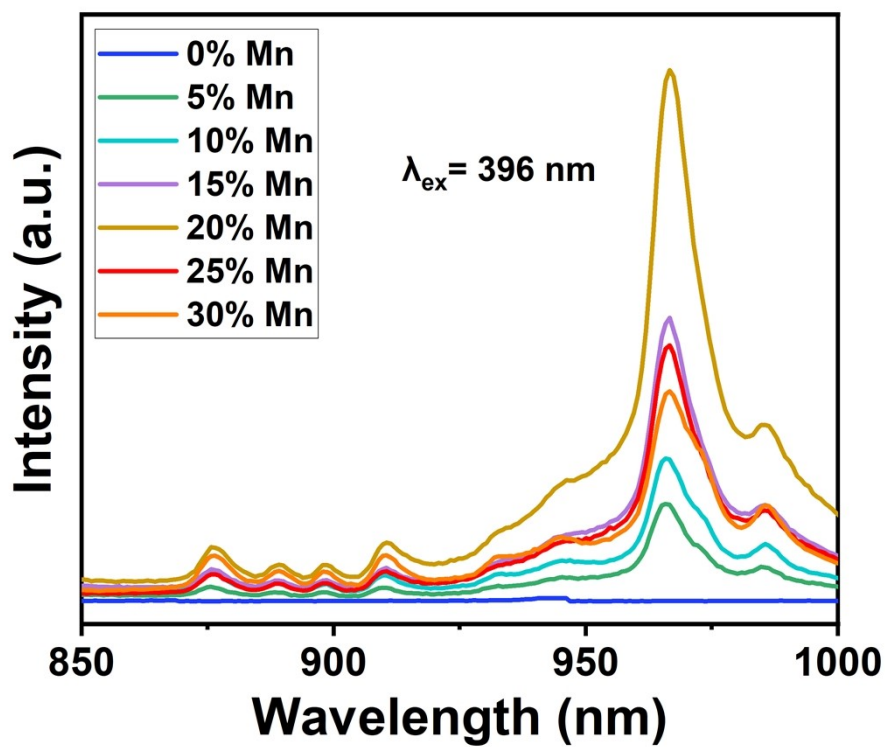

**Fig. S12** The Stokes emission spectra of KScF<sub>4</sub>: 1.5%Yb<sup>3+</sup>, xMn<sup>2+</sup> (x = 0%-30%) excited by 396 nm light.

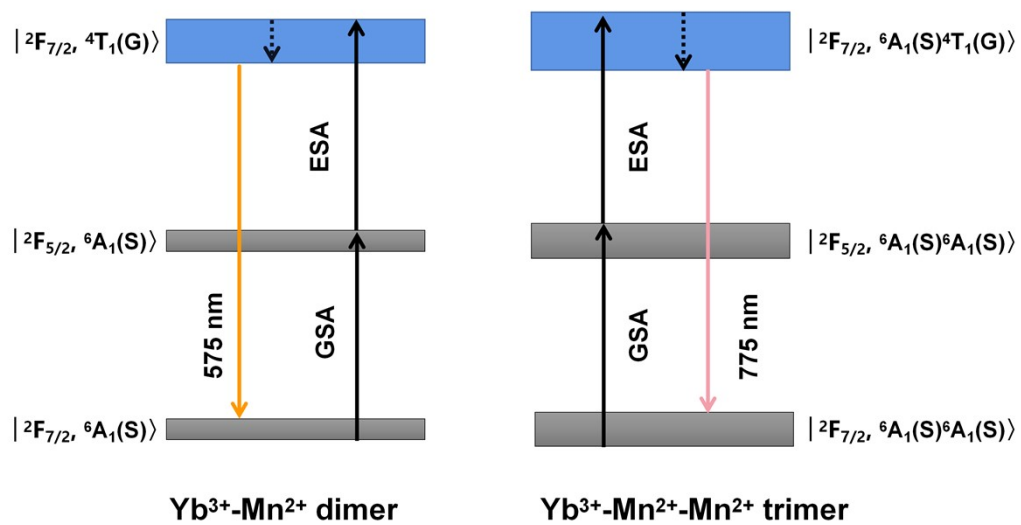

**Fig. S13** UC luminescence mechanism diagram in  $\text{KScF}_4: 1.5\% \text{Yb}^{3+}, x\text{Mn}^{2+}$  ( $x = 0\% \text{--} 30\%$ ).

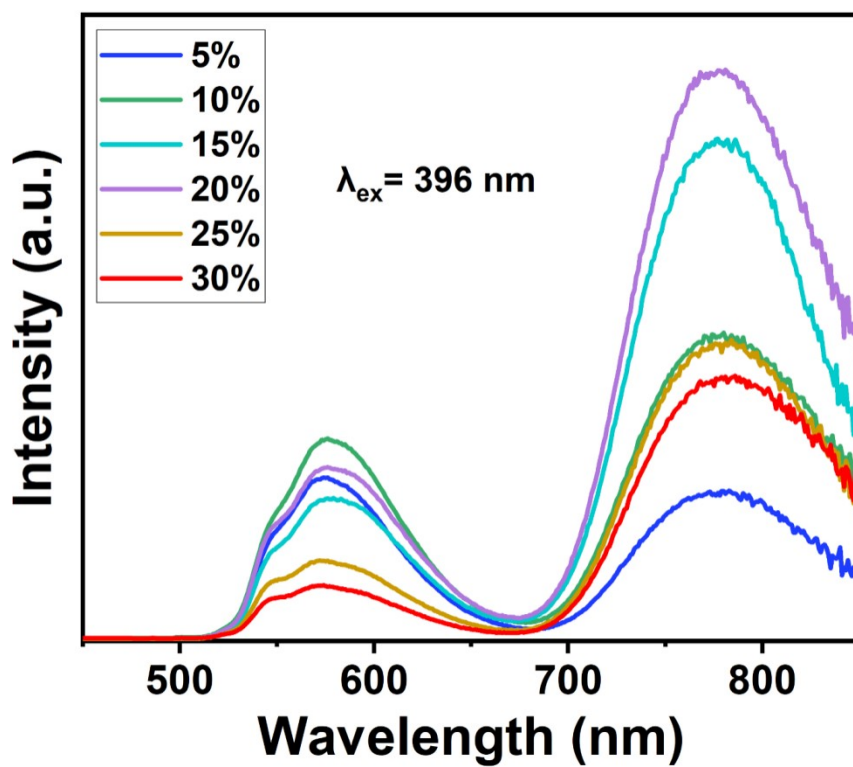

**Fig. S14** The emission spectra of KScF<sub>4</sub>: xMn<sup>2+</sup> ( $x = 5\%$ - $30\%$ ) excited by 396 nm light.



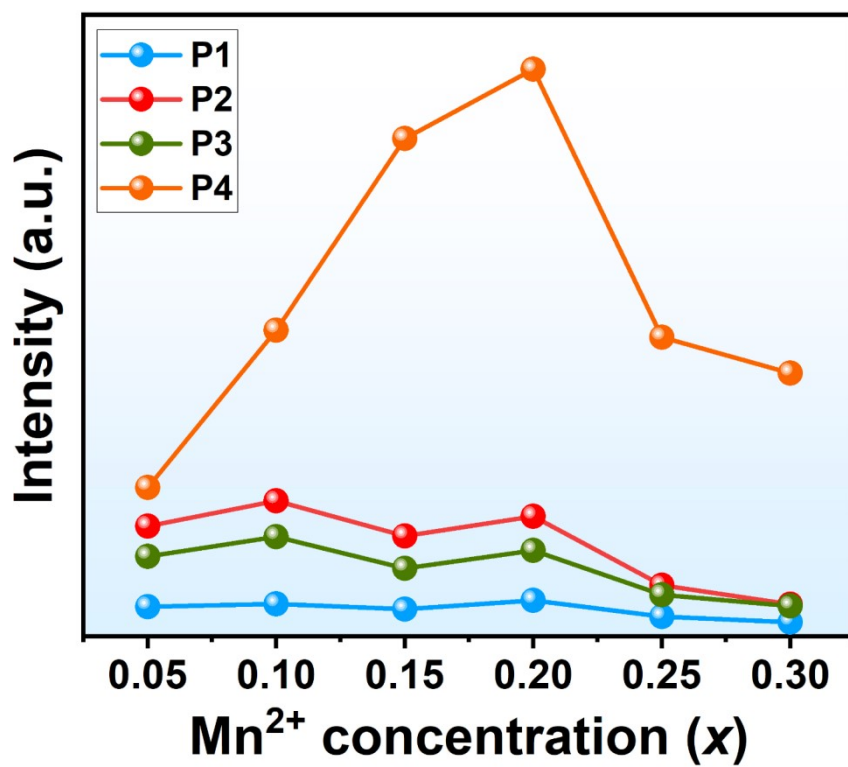

Fig. S15 Variation trends of P1, P2, P3 and P4 emission intensities with Mn<sup>2+</sup> concentration.

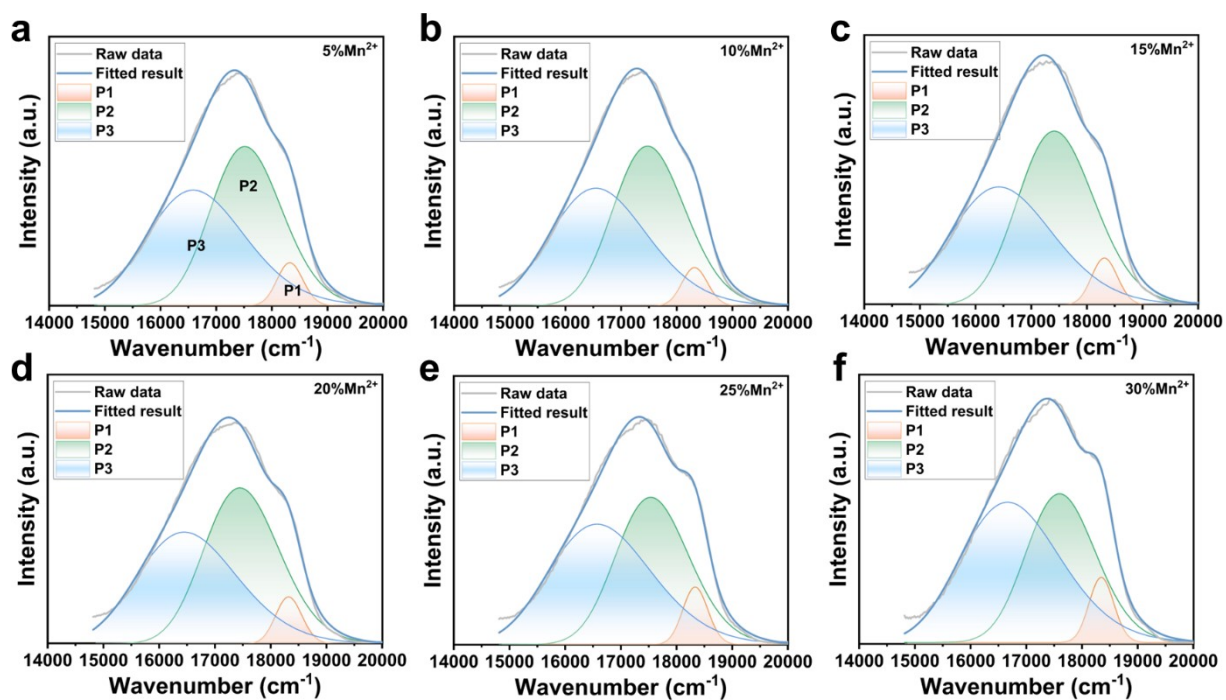

**Fig. S16** Gaussian decomposition of the emission peaks of  $\text{KScF}_4: x\text{Mn}^{2+}$  ( $x = 5\%-30\%$ ).

## Reference

- [1] W. Zhou, Y. Ou, L. Huang, E. Song, F. Ma, Z. Xia, H. Liang, Q. Zhang, *Adv. Mater.* **2022**, *34*, 2206287.
